# Supplementary material for: Bacteria and Soil Enzymes Supporting the Valorization of Forested Soils
Source: MDPI journal article supplement (doi:10.3390/ma15093287), 2022-05-04
Supplement: s1 [file s1]

# Bacteria and Soil Enzymes Supporting the Valorization of Forested Soils

**Table S1.** Granulometric composition of soils.

| Object                     | % of fractions ( <i>d</i> , mm) |                       |                   | Kind of soil    |
|----------------------------|---------------------------------|-----------------------|-------------------|-----------------|
|                            | sand                            | silt                  | clay              |                 |
|                            | $2.00 \geq d > 0.05$            | $0.05 \geq d > 0.002$ | $d \leq 0.002$    |                 |
| Non-afforested land        | 84.43 <sup>a</sup>              | 14.22 <sup>b</sup>    | 1.35 <sup>b</sup> | Sandy loam (SL) |
| <i>Picea abies</i> L.      | 84.83 <sup>a</sup>              | 14.16 <sup>b</sup>    | 1.01 <sup>e</sup> | Sandy loam (SL) |
| <i>Pinus sylvestris</i> L. | 86.15 <sup>a</sup>              | 12.63 <sup>d</sup>    | 1.22 <sup>c</sup> | Sandy loam (SL) |
| <i>Larix decidua</i> M.    | 85.85 <sup>a</sup>              | 13.12 <sup>c</sup>    | 1.03 <sup>e</sup> | Sandy loam (SL) |
| <i>Quercus robur</i> L.    | 81.95 <sup>b</sup>              | 16.38 <sup>a</sup>    | 1.67 <sup>a</sup> | Sandy loam (SL) |
| <i>Betula pendula</i> L.   | 86.56 <sup>a</sup>              | 13.33 <sup>c</sup>    | 1.11 <sup>d</sup> | Sandy loam (SL) |
| LSD <sub>0.05</sub>        | 2.281                           | 0.377                 | 0.034             | -               |

LSD – Least Significant Difference. Homogeneous groups denoted with letters (a-e) were calculated separately for each enzyme. LSD – Least Significant Difference

**Table S2.** Physicochemical properties of soils.

| Object                     | pH <sub>KCl</sub> | HAC                      | TEB               | CEC                | BS [%]            |
|----------------------------|-------------------|--------------------------|-------------------|--------------------|-------------------|
|                            |                   | mmol(+) kg <sup>-1</sup> |                   |                    |                   |
|                            |                   |                          |                   |                    |                   |
| Non-afforested land        | 4.90 <sup>c</sup> | 31.6 <sup>c</sup>        | 52.4 <sup>d</sup> | 84.0 <sup>c</sup>  | 62.4 <sup>c</sup> |
| <i>Picea abies</i> L.      | 4.40 <sup>e</sup> | 40.5 <sup>a</sup>        | 52.3 <sup>d</sup> | 92.8 <sup>a</sup>  | 56.4 <sup>e</sup> |
| <i>Pinus sylvestris</i> L. | 5.60 <sup>b</sup> | 27.3 <sup>e</sup>        | 54.4 <sup>c</sup> | 81.7 <sup>cd</sup> | 66.4 <sup>b</sup> |
| <i>Larix decidua</i> M.    | 5.90 <sup>a</sup> | 23.6 <sup>f</sup>        | 58.0 <sup>a</sup> | 81.5 <sup>d</sup>  | 71.1 <sup>a</sup> |
| <i>Quercus robur</i> L.    | 5.50 <sup>b</sup> | 30.2 <sup>d</sup>        | 56.2 <sup>b</sup> | 86.4 <sup>b</sup>  | 65.0 <sup>b</sup> |
| <i>Betula pendula</i> L.   | 4.70 <sup>d</sup> | 32.5 <sup>b</sup>        | 47.2 <sup>e</sup> | 79.7 <sup>e</sup>  | 59.2 <sup>d</sup> |
| LSD <sub>0.05</sub>        | 0.139             | 0.842                    | 1.437             | 2.268              | 1.708             |

HAC - hydrolytic acidity; EBC - exchangeable base cations; CEC - cation exchange capacity; BS - base saturation. LSD – Least Significant Difference. Homogeneous groups denoted with letters (a-e) were calculated separately for each enzyme. LSD – Least Significant Difference

**Table S3.** Characteristics of soil.

| Object                     | Content in 1 kg DM   |                   |                   |                    |                   |                    |                    |                   |                   |
|----------------------------|----------------------|-------------------|-------------------|--------------------|-------------------|--------------------|--------------------|-------------------|-------------------|
|                            | Total, g             |                   | Available, mg     |                    |                   | Exchangeable, mg   |                    |                   |                   |
|                            | C <sub>organic</sub> | N                 | P                 | K                  | Mg                | K                  | Ca                 | Na                | Mg                |
| Non-afforested land        | 5.50 <sup>e</sup>    | 0.66 <sup>d</sup> | 29.9 <sup>e</sup> | 85.5 <sup>c</sup>  | 20.0 <sup>f</sup> | 134.0 <sup>c</sup> | 214.3 <sup>d</sup> | 20.0 <sup>d</sup> | 18.0 <sup>e</sup> |
| <i>Picea abies</i> L.      | 17.3 <sup>a</sup>    | 0.91 <sup>a</sup> | 9.98 <sup>d</sup> | 37.3 <sup>f</sup>  | 36.0 <sup>b</sup> | 80.0 <sup>e</sup>  | 325.0 <sup>c</sup> | 40.0 <sup>c</sup> | 34.0 <sup>c</sup> |
| <i>Pinus sylvestris</i> L. | 6.90 <sup>d</sup>    | 0.62 <sup>e</sup> | 49.0 <sup>c</sup> | 49.8 <sup>e</sup>  | 32.0 <sup>d</sup> | 82.0 <sup>e</sup>  | 400.0 <sup>b</sup> | 20.0 <sup>d</sup> | 25.0 <sup>d</sup> |
| <i>Larix decidua</i> M.    | 9.40 <sup>c</sup>    | 0.67 <sup>d</sup> | 69.9 <sup>a</sup> | 107.9 <sup>a</sup> | 34.0 <sup>c</sup> | 144.0 <sup>b</sup> | 500.0 <sup>a</sup> | 60.0 <sup>b</sup> | 42.0 <sup>b</sup> |
| <i>Quercus robur</i> L.    | 13.5 <sup>b</sup>    | 0.73 <sup>b</sup> | 43.0 <sup>d</sup> | 103.7 <sup>b</sup> | 50.0 <sup>a</sup> | 164.0 <sup>a</sup> | 325.0 <sup>c</sup> | 20.0 <sup>d</sup> | 54.8 <sup>a</sup> |
| <i>Betula pendula</i> L.   | 9.30 <sup>c</sup>    | 0.71 <sup>c</sup> | 67.7 <sup>b</sup> | 70.5 <sup>d</sup>  | 28.0 <sup>e</sup> | 128.0 <sup>d</sup> | 214.3 <sup>d</sup> | 80.0 <sup>a</sup> | 25.0 <sup>d</sup> |
| LSD <sub>0.05</sub>        | 0.297                | 0.019             | 1.329             | 2.152              | 0.927             | 3.380              | 9.255              | 1.240             | 0.949             |

LSD – Least Significant Difference. Homogeneous groups denoted with letters (a-e) were calculated separately for each enzyme. LSD – Least Significant Difference

**Table S4.** Enzymatic activity in soil, kg<sup>-1</sup> DM of soil h<sup>-1</sup>.

| Object                     | Deh<br>(μMol<br>TFF) | Cat<br>(Mol O <sub>2</sub> ) | Ure<br>(mMol<br>N-NH <sub>4</sub> ) | Pac                | Pal<br>(mMol 4-nitrophenol PN) | Glu                | Aryl               |
|----------------------------|----------------------|------------------------------|-------------------------------------|--------------------|--------------------------------|--------------------|--------------------|
| Non-afforested land        | 9.886 <sup>e</sup>   | 3.072 <sup>e</sup>           | 1.044 <sup>cd</sup>                 | 2.151 <sup>c</sup> | 0.237 <sup>e</sup>             | 0.354 <sup>f</sup> | 0.190 <sup>e</sup> |
| <i>Picea abies</i> L.      | 25.96 <sup>b</sup>   | 3.218 <sup>d</sup>           | 0.843 <sup>e</sup>                  | 2.434 <sup>b</sup> | 0.278 <sup>d</sup>             | 0.831 <sup>b</sup> | 0.371 <sup>c</sup> |
| <i>Pinus sylvestris</i> L. | 21.95 <sup>c</sup>   | 3.355 <sup>a</sup>           | 1.082 <sup>c</sup>                  | 2.074 <sup>c</sup> | 0.506 <sup>b</sup>             | 0.613 <sup>c</sup> | 0.334 <sup>d</sup> |
| <i>Larix decidua</i> M.    | 21.40 <sup>c</sup>   | 3.353 <sup>a</sup>           | 1.554 <sup>a</sup>                  | 1.783 <sup>d</sup> | 0.906 <sup>a</sup>             | 0.465 <sup>e</sup> | 0.417 <sup>b</sup> |
| <i>Quercus robur</i> L.    | 43.51 <sup>a</sup>   | 3.288 <sup>b</sup>           | 1.192 <sup>b</sup>                  | 3.455 <sup>a</sup> | 0.417 <sup>c</sup>             | 1.251 <sup>a</sup> | 0.523 <sup>a</sup> |
| <i>Betula pendula</i> L.   | 14.10 <sup>d</sup>   | 3.235 <sup>c</sup>           | 1.020 <sup>d</sup>                  | 2.170 <sup>c</sup> | 0.239 <sup>e</sup>             | 0.555 <sup>d</sup> | 0.328 <sup>d</sup> |
| LSD <sub>0.05</sub>        | 0.867                | 0.011                        | 0.58                                | 0.129              | 0.020                          | 0.018              | 0.019              |

Deh - dehydrogenases; Ure - urease, Pal – alkaline phosphatase, Pac – acid phosphatase, Aryl - arylsulphatase, Glu – β-glucosidase. Homogeneous groups denoted with letters (a-e) were calculated separately for each enzyme. LSD – Least Significant Difference.
